# Supplementary material for: What contribution do detergent fatty alcohols make to sewage discharges and the marine environment?
Source: Royal Society of Chemistry journal article supplement (doi:10.1039/c0em00079e), 2010-01-01
Supplement: c0em00079e.pdf [file c0em00079e.pdf]

## Supporting Information

### Photographs of soil sampling locations

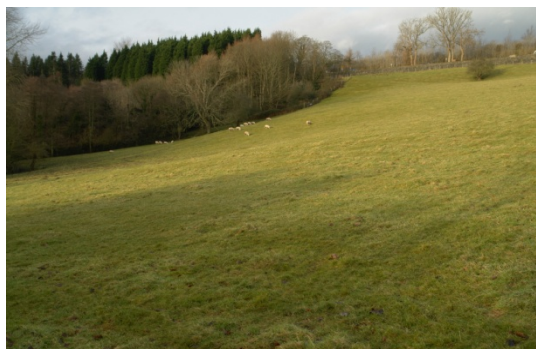

Pasture Field

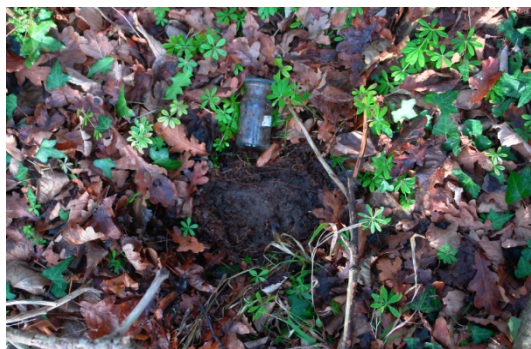

Deciduous (oak) woodland soil

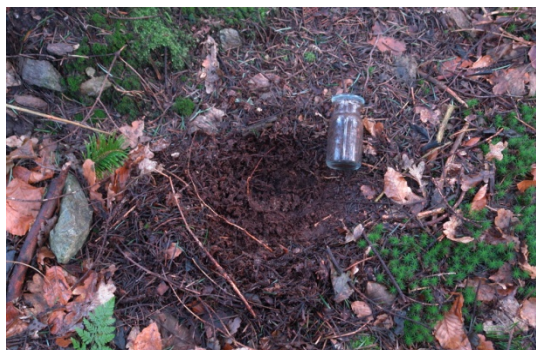

Coniferous woodland soil

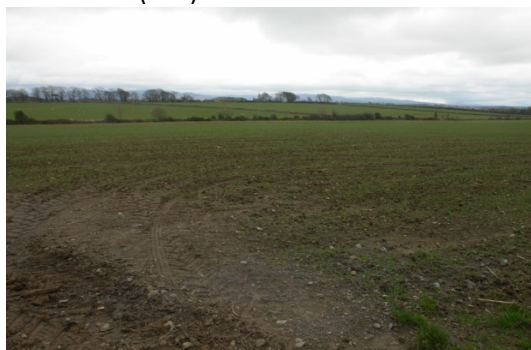

Arable field

### Photographs of sediment sampling locations with distances from the outfall location

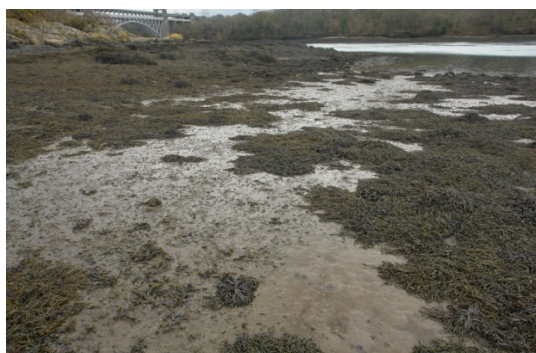

St. Mary's Church with discharge on opposite side of the Menai Strait (250 m)

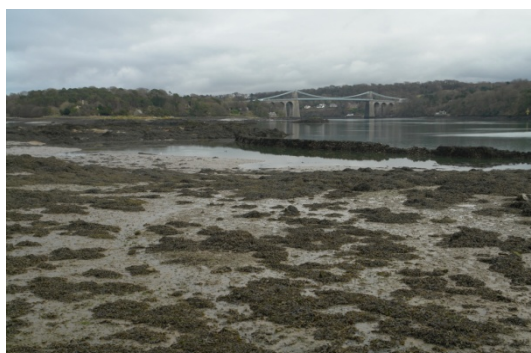

Between the Bridges, The Swellies, with Menai Bridge in the background (1000 m)

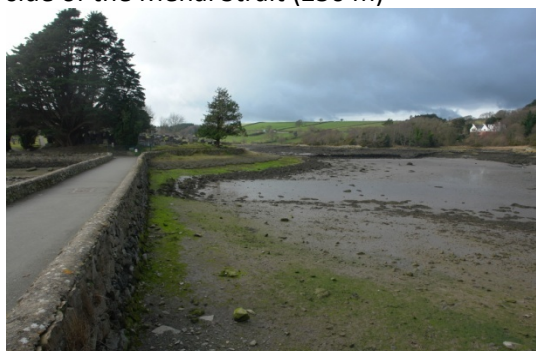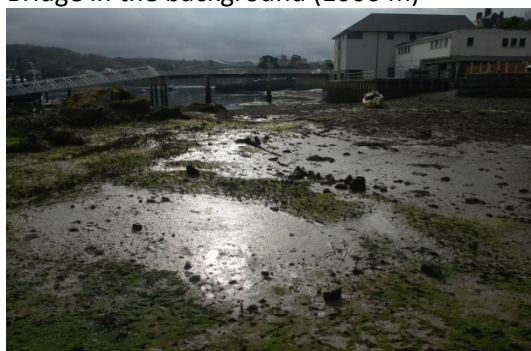



Church Island (1700 m)  
Photographs of the WWTP at Treborth

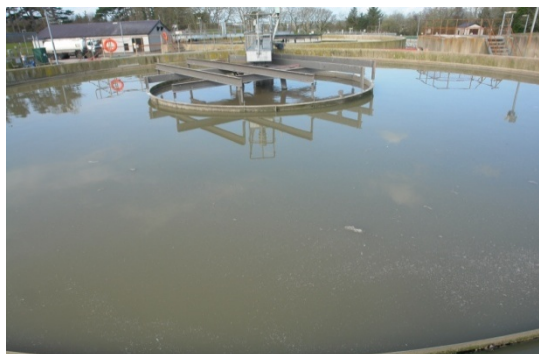

Influent samples were collected from the central feed to this primary settlement tank

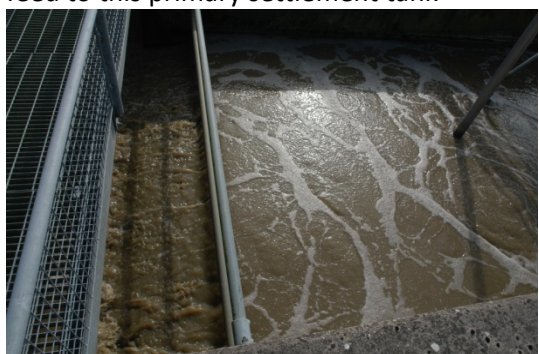

Post secondary treatment samples were collected as they crossed the final weir

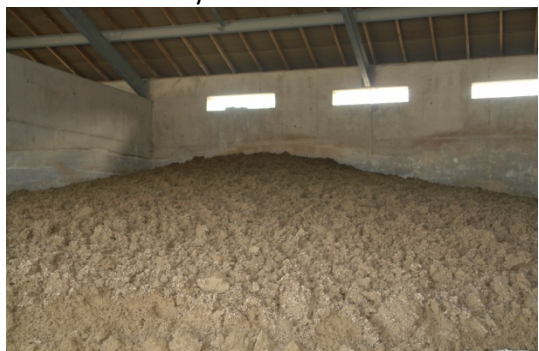

Sludge samples were collected from the holding bays after lime treatment

Menai Bridge (2700 m)

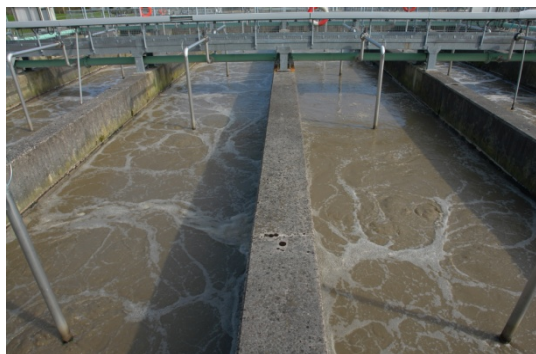

Post primary settlement samples were collected at the start of the oxidation ditch

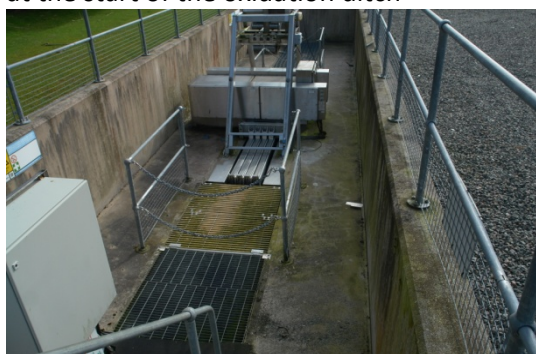

Final effluent samples were collected at the designated Environment Agency sampling point
